# Supplementary material for: Hierarchically Porous Carbon Nanosheets from One-Step Carbonization of Zinc Gluconate for High-Performance Supercapacitors
Source: MDPI journal article supplement (doi:10.3390/ijms241814156), 2023-09-15
Supplement: s1 [file s1]

## Supporting Information

### Hierarchically Porous Carbon Nanosheets from One-step Carbonization of Zinc Gluconate for High-Performance Supercapacitors

Zhiwei Tian <sup>1,†</sup>, Zhangzhao Weng <sup>2,†,\*</sup>, Junlei Xiao <sup>1</sup>, Feng Wang <sup>1</sup>, Chunmei Zhang <sup>3</sup> and Shaohua Jiang <sup>1,\*</sup>

The kinetics of the charge storage process can be evaluated by the CV curves, where the total charge storage can be separated as the capacitive effects and diffusion-controlled charge storage, which can be expressed by the following eq (S1) and eq (S2), where the  $i$  is the peak current,  $v$  is the scan rate,  $a$  and  $b$  are the fitting parameters:

$$i_{total} = i_{cap} + i_{diff} = av^b \quad (S1)$$

$$\log i = \log a + b \log v \quad (S2)$$

The capacitance contributions from the surface capacitive effects and the diffusion-controlled intercalation process can be quantitatively distinguished by eq (S3) and eq (S4). Where  $k_1v$  and  $k_2v^{1/2}$  are the capacitive effects and diffusion-controlled intercalation process contributions, respectively:

$$I(V) = k_1v + k_2v^{1/2} \quad (S3)$$

$$i(V)/v^{1/2} = k_1v^{1/2} + k_2 \quad (S4)$$

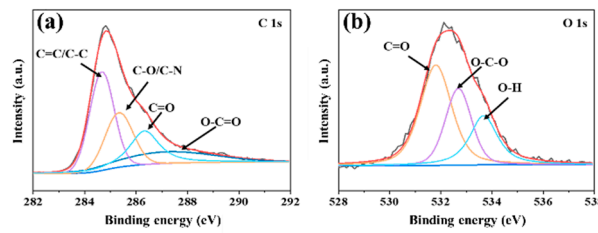

**Figure S1** High-resolution of C 1s(a) and O 1s(b) of ZnPCN-1.

**Table S1** Textural parameters of all samples.

| Samples   | $S_{\text{BET}}$ ( $\text{m}^2 \text{g}^{-1}$ ) <sup>a</sup> | $V_{\text{t}}$ ( $\text{cm}^3 \text{g}^{-1}$ ) <sup>b</sup> | $D_{\text{p}}$ (nm) <sup>c</sup> | N content (at %) |
|-----------|--------------------------------------------------------------|-------------------------------------------------------------|----------------------------------|------------------|
| ZnPCN-0.5 | 1135                                                         | 0.47                                                        | 3.32                             | 2.95             |
| ZnPCN-1   | 1162                                                         | 0.49                                                        | 3.33                             | 4.57             |
| ZnPCN-2   | 1146                                                         | 0.48                                                        | 3.38                             | 4.40             |

<sup>a</sup> BET surface area.<sup>b</sup> Total pore volume.<sup>c</sup> Desorption average pore diameter by BET method.**Table S2** Comparison of ZnPCN-1 with the reported work.

| Samples    | Current density       | Specific capacitance  | Electrolyte                  | Ref.      |
|------------|-----------------------|-----------------------|------------------------------|-----------|
| ZnPCN-1    | 1 A $\text{g}^{-1}$   | 221 F $\text{g}^{-1}$ | 6 M KOH                      | This work |
| C9-250k-12 | 0.5 A $\text{g}^{-1}$ | 197 F $\text{g}^{-1}$ | 1 M $\text{Na}_2\text{SO}_4$ | [1]       |
| MA6        | 0.5 A $\text{g}^{-1}$ | 182 F $\text{g}^{-1}$ | 3 M KOH                      | [2]       |
| SAK        | 2 mVs <sup>-1</sup>   | 129 F $\text{g}^{-1}$ | PVA/LiCl                     | [3]       |
| SSP-900    | 1 A $\text{g}^{-1}$   | 199 F $\text{g}^{-1}$ | 3 M KOH                      | [4]       |
| Gna-CA     | 1 A $\text{g}^{-1}$   | 140 F $\text{g}^{-1}$ | 1 M $\text{Na}_2\text{SO}_4$ | [5]       |

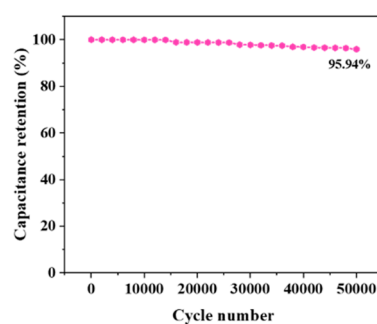**Figure S2** Cycling performance of ZnPCN-1 at a current density of 50 A  $\text{g}^{-1}$  in 6 M KOH.

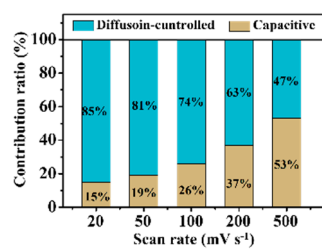

**Figure S3** Capacitance contribution ratios of ZnPCN-1 at different sweep rates.

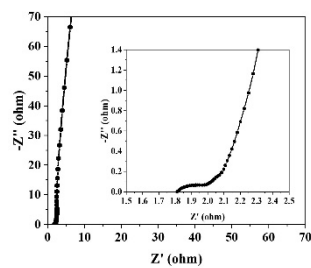

**Figure S4** EIS plots of ZnPCN-1//ZnPCN-1 in 6 M KOH.

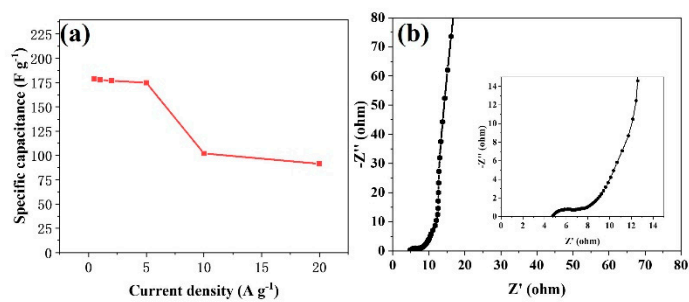

**Figure S5** Rate performance (a), EIS plots (b) of ZnPCN-1//ZnPCN-1 in Et<sub>4</sub>NBF<sub>4</sub>.

**Table S3** Comparison of ZnPCN-1//ZnPCN-1 with the reported work.

| Samples                                      | Energy density<br>(Wh Kg <sup>-1</sup> ) | Power den-<br>sity<br>(W Kg <sup>-1</sup> ) | Electrolyte                          | Ref.      |
|----------------------------------------------|------------------------------------------|---------------------------------------------|--------------------------------------|-----------|
| ZnPCN-1//ZnPCN-1                             | 17.2                                     | 499                                         | 6 M KOH                              | This work |
| ZnPCN-1//ZnPCN-1                             | 153.4                                    | 1242                                        | 1 M Et <sub>4</sub> NBF <sub>4</sub> | This work |
| WC-E-100-48//WC-E-<br>100-48                 | 11.0                                     | 26.3                                        | 6 M KOH                              | [6]       |
| WBM <sub>s</sub> -800//WBM <sub>s</sub> -800 | 9.4                                      | 227                                         | 6 M KOH                              | [7]       |
| Co(OH) <sub>2</sub> @CW//CW                  | 6.5                                      | 236                                         | 2 M KOH                              | [8]       |
| NiCo-P//CW                                   | 12.1                                     | 395                                         | 2 M KOH                              | [9]       |
| N-M-O//Carbon                                | 20.1                                     | 226                                         | 1 M Na <sub>2</sub> SO <sub>4</sub>  | [10]      |
| MnO <sub>x</sub> /PANI//Carbon               | 37.0                                     | 800                                         | H <sub>2</sub> SO <sub>4</sub> /PVA  | [11]      |

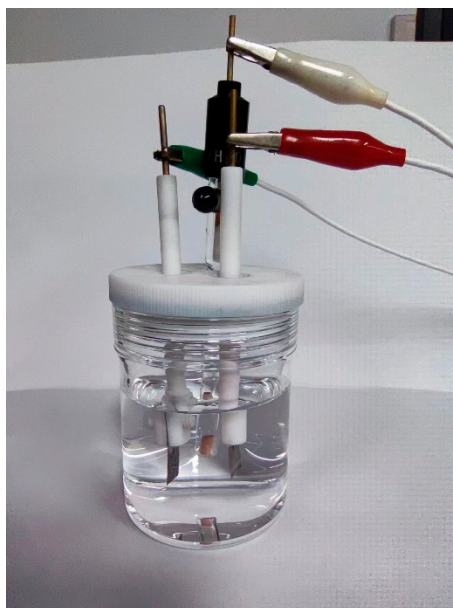

**Figure S6** Photograph of the three-electrode system.

## References

1. Zhang, W.; Li, W.; Li, S., Self-template activated carbons for aqueous supercapacitors. *Sustainable Materials and Technologies* **2023**, 36, e00582.
2. Khajonrit, J.; Sichumsaeng, T.; Kalawa, O.; Chaisit, S.; Chinnakorn, A.; Chanlek, N.; Maensiri, S., Mangosteen peel-derived activated carbon for supercapacitors. *Progress in Natural Science: Materials International* **2022**, 32, (5), 570-578.
3. Zhang, X.; Zhao, M.; Chen, Z.; Yan, T.; Li, J.; Ma, Y.; Ma, L., The application of biomass-based carbon materials in flexible all-solid supercapacitors. *Journal of Materials Science: Materials in Electronics* **2022**, 33, (19), 15422-15432.
4. Pandey, K.; Jeong, H. K., Coffee waste-derived porous carbon based flexible supercapacitors. *Chemical Physics Letters* **2022**, 809, 140173.
5. Fuertes, A. B.; Sevilla, M., Hierarchical Microporous/Mesoporous Carbon Nanosheets for High-Performance Supercapacitors. *ACS Applied Materials & Interfaces* **2015**, 7, (7), 4344-4353.
6. Wang, F.; Cheong, J. Y.; Lee, J.; Ahn, J.; Duan, G.; Chen, H.; Zhang, Q.; Kim, I. D.; Jiang, S., Pyrolysis of Enzymolysis-Treated Wood: Hierarchically Assembled Porous Carbon Electrode for Advanced Energy Storage Devices. *Advanced Functional Materials* **2021**, 31, (31), 2101077.
7. Ma, Y.; Yao, D.; Liang, H.; Yin, J.; Xia, Y.; Zuo, K.; Zeng, Y.-P., Ultra-thick wood biochar monoliths with hierarchically porous structure from cotton rose for electrochemical capacitor electrodes. *Electrochimica Acta* **2020**, 352, 136452.
8. Wang, Y.; Lin, X.; Liu, T.; Chen, H.; Chen, S.; Jiang, Z.; Liu, J.; Huang, J.; Liu, M., Wood-Derived Hierarchically Porous Electrodes for High-Performance All-Solid-State Supercapacitors. *Advanced Functional Materials* **2018**, 28, (52), 1806207.
9. Chen, Y.; Hou, H.; Liu, B.; Li, M.; Chen, L.; Chen, C.; Wang, S.; Li, Y.; Min, D., Wood-derived scaffolds decorating with nickel cobalt phosphate nanosheets and carbon nanotubes used as monolithic electrodes for assembling high-performance asymmetric supercapacitor. *Chemical Engineering Journal* **2023**, 454, 140453.
10. Xuan, H.; Xu, Y.; Liang, T.; Liang, X.; Xie, Z.; Han, P.; Du, Y., Molten Salt Synthesis of Na-Mn-O Composites as Electrode Materials for High-Performance Supercapacitors. *ChemElectroChem* **2019**, 6, (6), 1838-1845.
11. Ye, Q.; Luo, Y.; Cen, Q.; Dong, R.; Luo, T.; Xu, X.; Wang, F.; Li, B., In situ hybridization of polyaniline on Mn oxide for high-performance supercapacitor. *Journal of Energy Storage* **2021**, 36, 102330.
